# Supplementary material for: Metal–support interaction-modulated catalytic activity of Ru nanoparticles on Sm2O3 for efficient ammonia decomposition
Source: Royal Society of Chemistry journal article supplement (doi:10.1039/d1cy00080b), 2021-01-01
Supplement: d1cy00080b1.pdf [file d1cy00080b1.pdf]

## Electronic supplementary information (ESI)

### **Metal–support interaction modulated catalytic activity of Ru nanoparticles on Sm<sub>2</sub>O<sub>3</sub> for efficient ammonia decomposition**

Xilun Zhang,<sup>a,b</sup> Lin Liu,<sup>a\*</sup> Ji Feng,<sup>a,b</sup> Xiaohua Ju,<sup>a</sup> Jiemin Wang,<sup>a,c</sup> Teng He,<sup>a</sup> Ping Chen<sup>a\*</sup>

<sup>a</sup>*Dalian National Laboratory for Clean Energy, State Key Laboratory of Catalysis, Dalian Institute of Chemical Physics, Chinese Academy of Sciences, Dalian 116023, China*

<sup>b</sup>*University of Chinese Academy of Sciences, Beijing 100049, China*

<sup>c</sup>*Zhang Dayu School of Chemistry, Dalian University of Technology, Dalian 116024, China*

*E-mail: liulin@dicp.ac.cn, pchen@dicp.ac.cn*

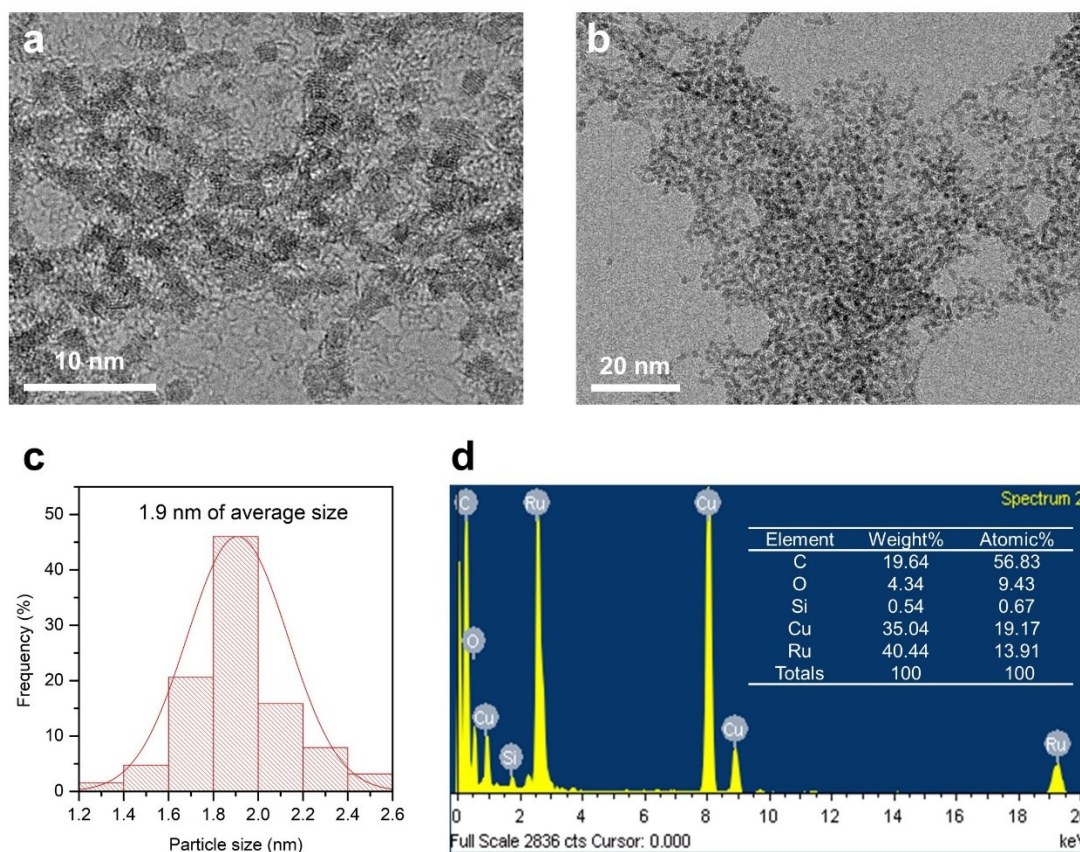

Fig. S1 TEM images in different scales (a–b), particle size distribution (c) and Energy Dispersive X-Ray (EDX) Spectroscopy (d) of RuO<sub>2</sub> NPs.

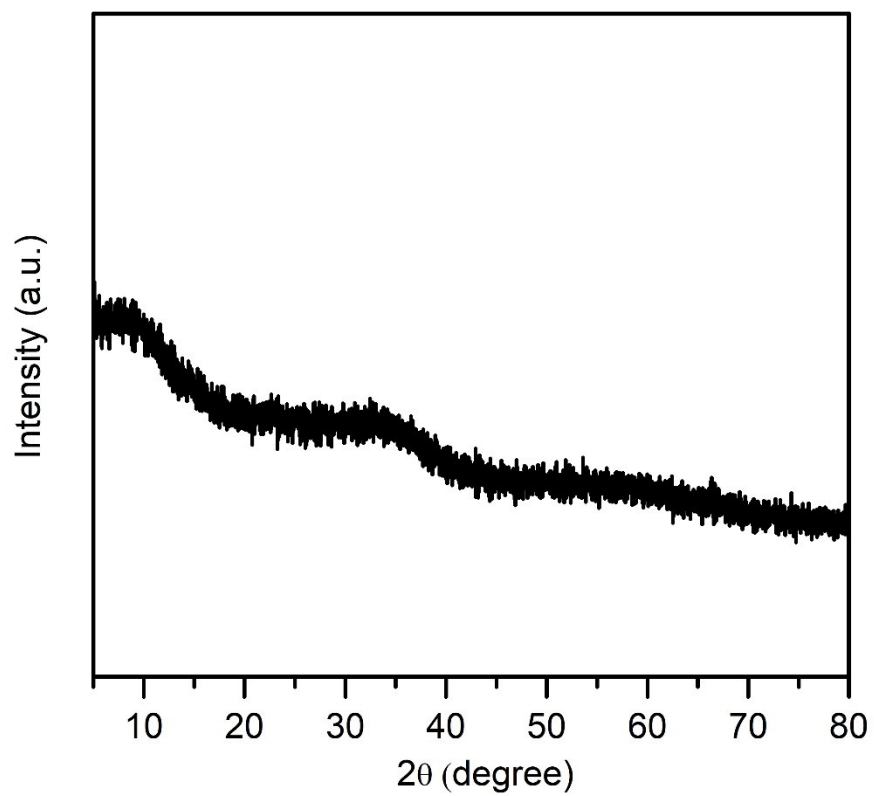

Fig. S2 XRD pattern of RuO<sub>2</sub> NPs.

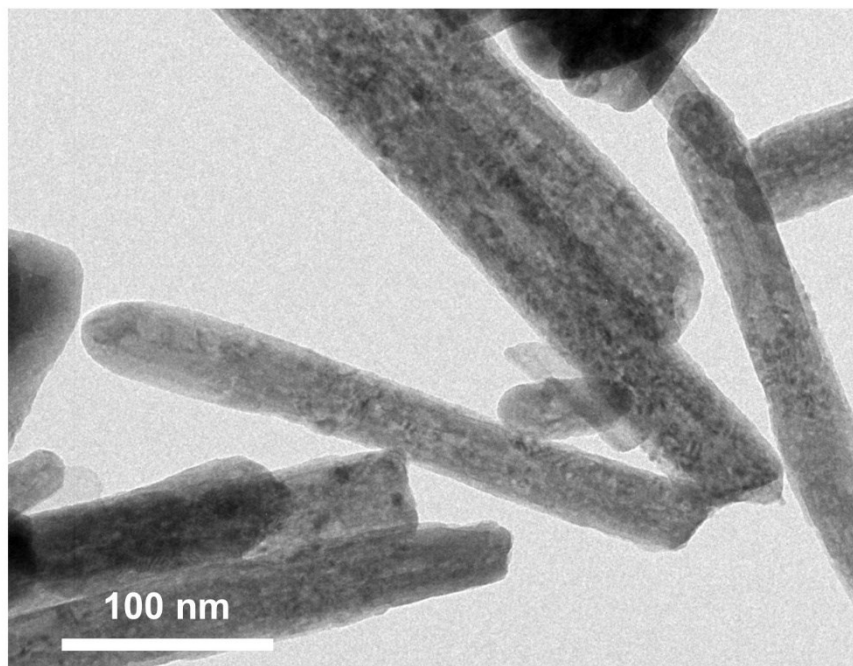

Fig. S3 TEM image of Sm(OH)<sub>3</sub> support.

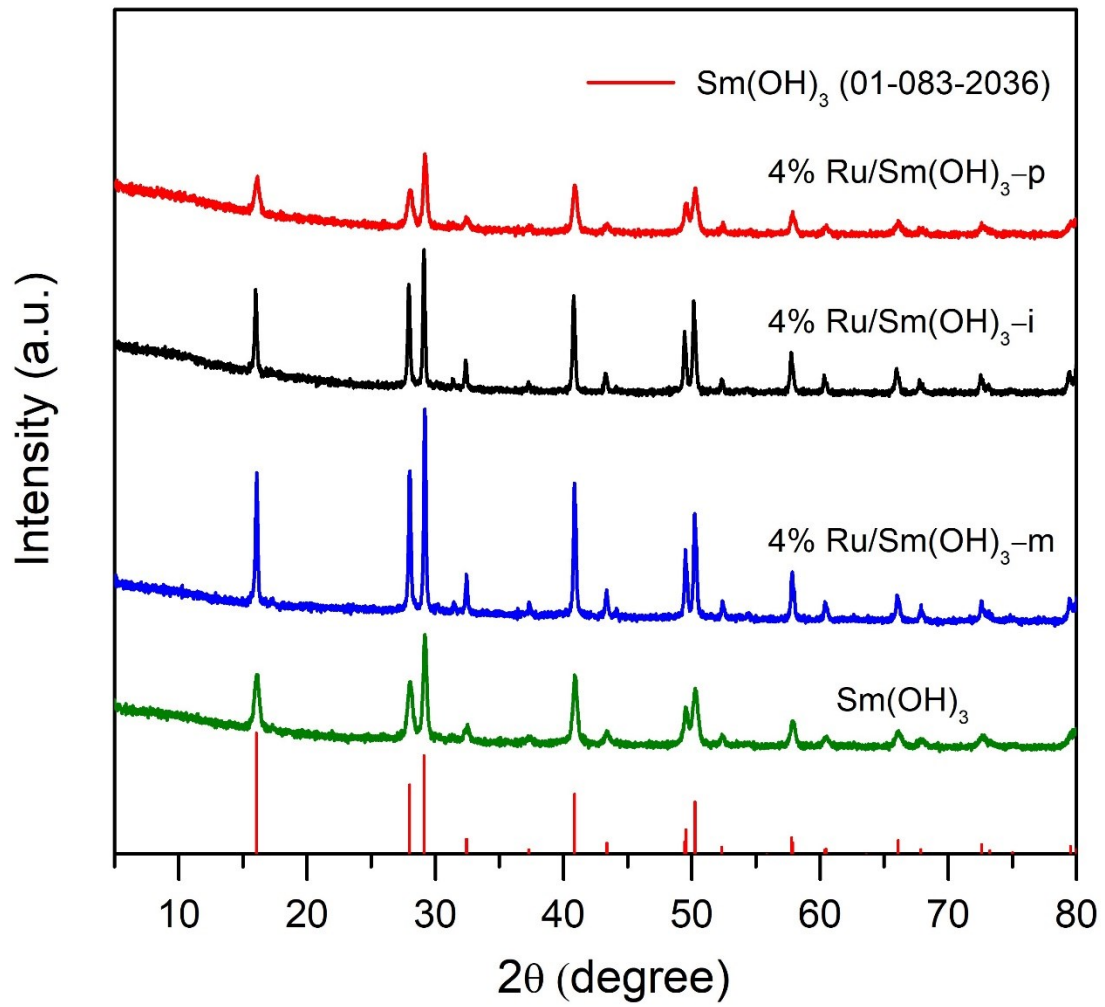

Fig. S4 XRD patterns of Sm(OH)<sub>3</sub>, 4% Ru/Sm(OH)<sub>3</sub>-m, 4% Ru/Sm(OH)<sub>3</sub>-i and 4% Ru/Sm(OH)<sub>3</sub>-p precursors.

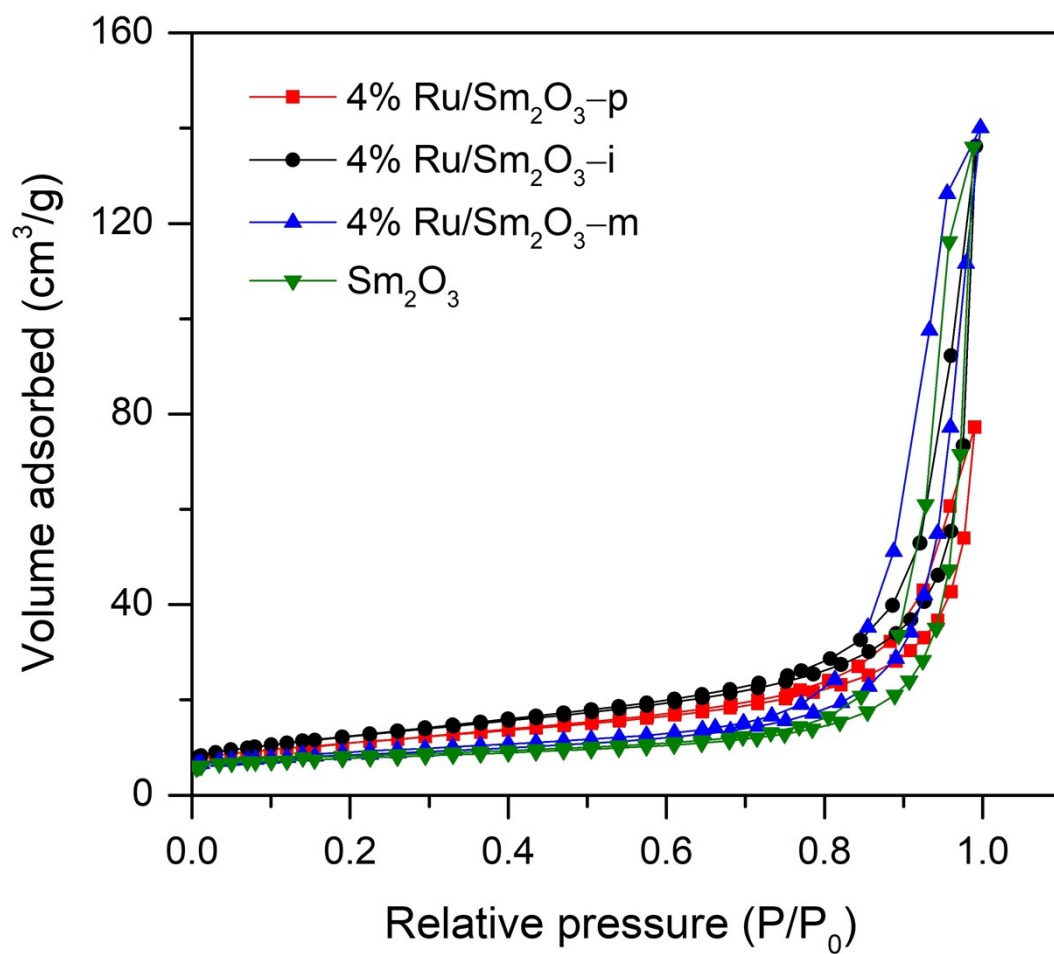

Fig. S5 N<sub>2</sub> adsorption-desorption isotherms of Sm<sub>2</sub>O<sub>3</sub> support, 4% Ru/Sm<sub>2</sub>O<sub>3</sub>-m, 4% Ru/Sm<sub>2</sub>O<sub>3</sub>-i and 4% Ru/Sm<sub>2</sub>O<sub>3</sub>-p catalysts.

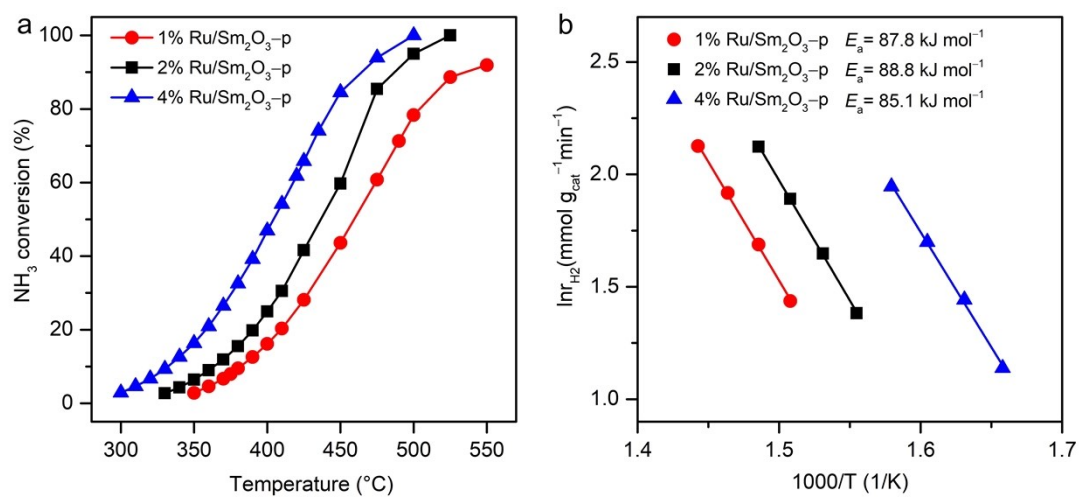

Fig. S6 Temperature-dependent NH<sub>3</sub> conversion (a) and Arrhenius plots (b) of Ru/Sm<sub>2</sub>O<sub>3</sub>-p with different Ru mass loadings. WHSV= 30,000 mL g<sub>cat</sub><sup>-1</sup> h<sup>-1</sup>.
